# Supplementary material for: Transcriptomic analysis of Litchi chinensis pericarp during maturation with a focus on chlorophyll degradation and flavonoid biosynthesis
Source: PubMed Central journal article supplement (PMC4376514; doi:10.1186/s12864-015-1433-4), 2015-03-21

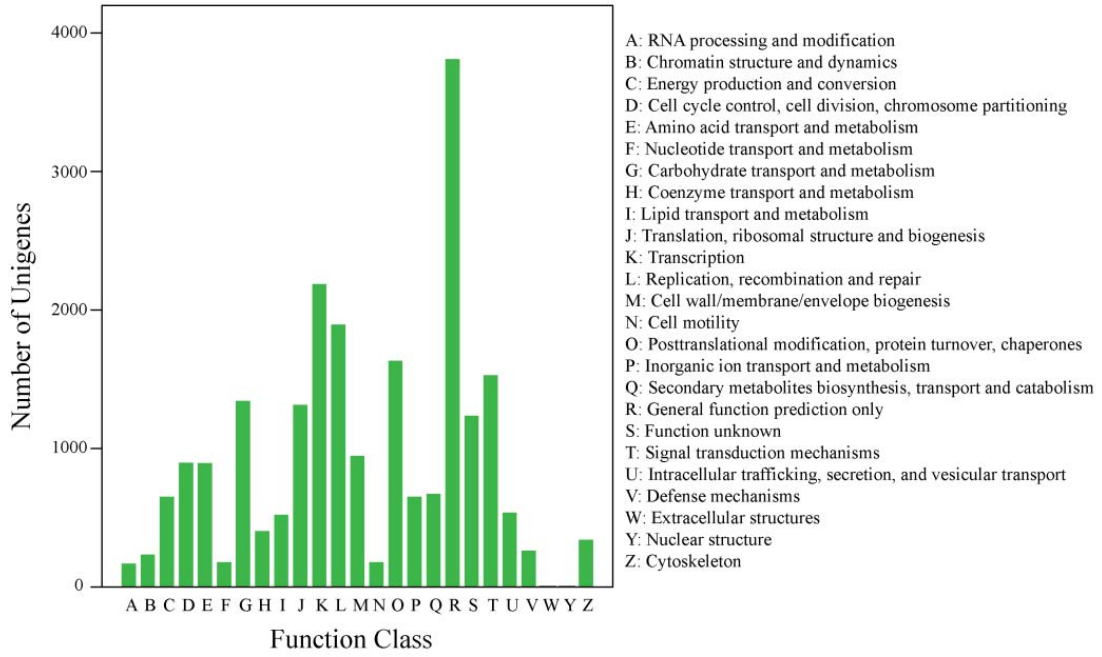

Supplement: 12864_2015_1433_MOESM3_ESM.pdf [file 12864_2015_1433_MOESM3_ESM.pdf]
