# Supplementary material for: Transcriptomic analysis of Litchi chinensis pericarp during maturation with a focus on chlorophyll degradation and flavonoid biosynthesis
Source: PubMed Central journal article supplement (PMC4376514; doi:10.1186/s12864-015-1433-4), 2015-03-21
Supplement: 12864_2015_1433_MOESM13_ESM.pdf [file 12864_2015_1433_MOESM13_ESM.pdf]

**Primers used for quantitative real-time PCR analysis.**

| Gene                  | Forward (5' -3' )        | Reverse (5' -3' )         |
|-----------------------|--------------------------|---------------------------|
| Unigene0030141 (F3H)  | CTGCAACTCTCACAGCTCTT     | GAAGATACCCCAGTCCTCAC      |
| Unigene0004996 (F3H)  | GTGAGATACTGGAGGAGCATAA   | TACAGTGCTTGATGTGGTGTC     |
| Unigene0021395 (CHI)  | CCTCTATCCTTTTCACACAATC   | CGTCTTCAGGCTTCTTATCAT     |
| Unigene0040379 (UFGT) | GCAAGAATGGTACAAGATGAGT   | AGCTGTTTCTGCTAGTTGTTTG    |
| Unigene0034194 (PAL)  | TAGCTCTACATACCCGTTGATG   | CTGTTTGAGATAGGAGCATTGT    |
| Unigene0048046 (LAR)  | CAAAGTTGTTGGTACAGTCAAG   | AGGATGGTGGTTGTCATAGTAG    |
| Unigene0017070 (ANR)  | AGGGCTATGTTGTTCCACTAC    | AGCAAAATTGACTGGTGTTG      |
| Unigene0034202 (PAL)  | GTCCACCCACTTTCTCTTTTAC   | TGACCATTCTTTCTGTACT       |
| Unigene0018461 (CHI)  | CTGGAGAAAGTTGTTGAGTTC    | GAGGTTATGGTTGTAGGAGACA    |
| Unigene0034195 (PAL)  | AGAATTTACGGACCACTTGAC    | TAGCCATTGAGGAGATGTTCTA    |
| Unigene0004803 (ANS)  | CAGGTAGAAGCCGTAATATGAT   | ACATCAGTACCCTCAAATCAG     |
| Unigene0025384 (CLH)  | TCGGTATAGCAGATGAGTTACA   | CAGTAGTTCGGTTGACCTAGTCT   |
| Unigene0040467 (CLH)  | GACACATGGACGTTTTAGATG    | GAGCAACAGAACGGTAGTCTT     |
| Unigene0024586 (PPH)  | CGGCTTTGGTGTGGTAGTT      | TTCCCTCCGTTGTATCTCCTT     |
| Unigene0048135 (SGR)  | TGGAAAACAAGAGAGAGAGAGA   | CCAGAAACAGAACCTTCAACT     |
| ACTIN                 | ACCGTATGAGCAAGGAAATCACTG | TCGTCGTA CTACCCTTTGAAATC  |
| GAPDH                 | GATACAGTCCCGTGTGTTGAC    | CATAAAGACACATAACACCACACTC |
